# Supplementary material for: Design and Characterization of a Recombinant Brucella abortus RB51 Vaccine That Elicits Enhanced T Cell-Mediated Immune Response
Source: MDPI journal article supplement (doi:10.3390/vaccines10030388), 2022-03-03
Supplement: s1 [file s1]

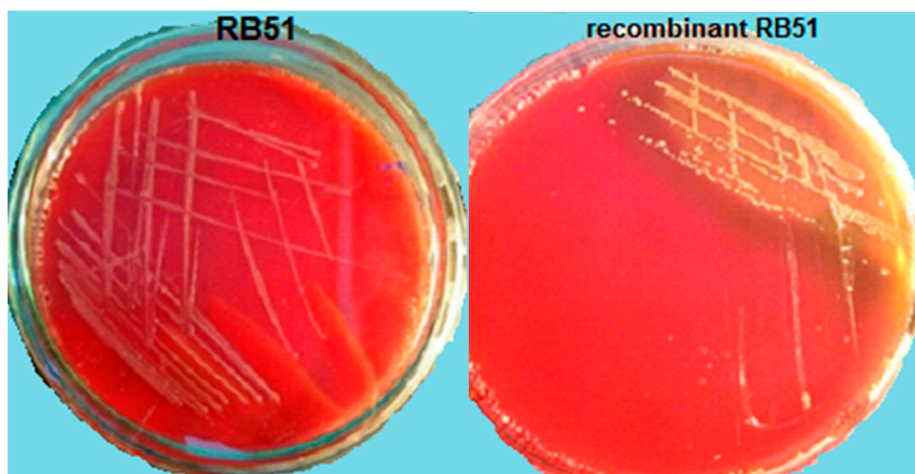

**Figure S1.** Hemolytic activities of LLO secreted by rRB51 strains on sheep blood agar plate.

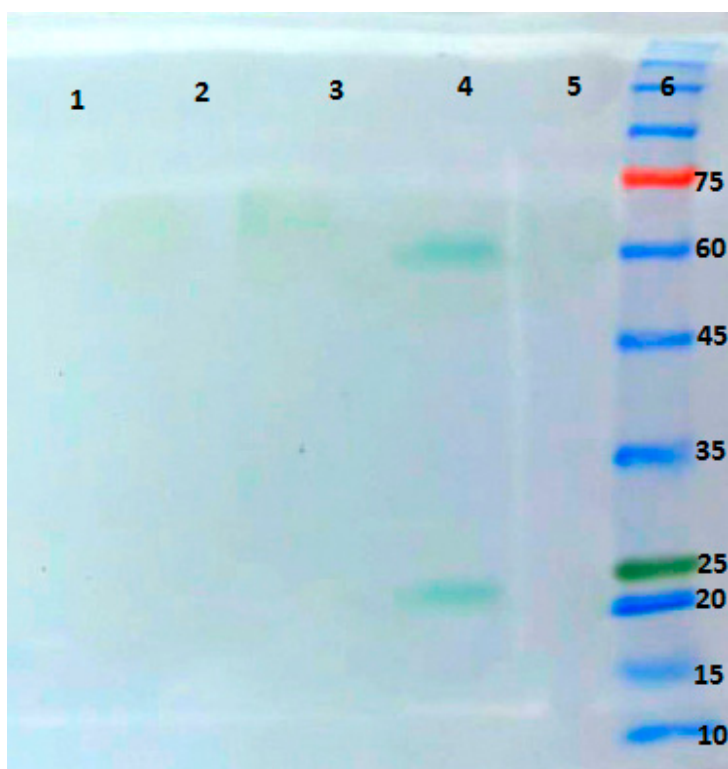

**Figure S2.** Western blots showing secretion of mLLO and BAX-SMAC by rRB51. Lane 1, RB51 culture supernatant; Lanes 2, 3, 4, and 5, the supernatant of rRB51 culture; Lane 6, Protein marker. The 21kDa and 58kDa bands are related to BAX-SMAC and mLLO protein, respectively.
